# Supplementary material
Source: publisher figshare collection journal article supplement (https://tandf.figshare.com/ndownloader/files/9592711)
Supplement: Supplementary file 1 [file 9592711]

# SUPPLEMENTARY MATERIAL

## *Cytotoxic indole alkaloids from Nauclea orientalis*

Yan-Ping Liu<sup>a,b</sup>, Peng-Kun Ju<sup>a</sup>, Jin-Tao Long<sup>a</sup>, Liang Lai<sup>a</sup>, Wan-Hui Zhao<sup>a</sup>, Chao Zhang<sup>a</sup>, Zhi-Jie Zhang<sup>a</sup>, Yan-Hui Fu<sup>a,b\*</sup>

<sup>a</sup> Key Laboratory of Tropical Medicinal Plant Chemistry of Ministry of Education, Hainan Normal University, Haikou 571158, P. R. China

<sup>b</sup> College of Chemistry and Chemical Engineering, Hainan Normal University, Haikou 571158, P. R. China

\*Corresponding author.

Tel.: +86-86-898-65889422; Fax: +86-898-65889422

E-mail: fuyanhui80@126.com.

### ABSTRACT

A new indole alkaloid, nauclorenine (**1**), along with seven known alkaloids (**2-8**), were isolated from the stems and leaves of *Nauclea orientalis*. Among them, nauclorenine (**1**) was a new indole alkaloid holding a rare corynanthe-type skeleton, and the known compounds (**2-8**) were isolated from *N. orientalis* for the first time. Their structures were elucidated on the basis of extensive spectroscopic data analyses. All isolated compounds were evaluated for their cytotoxicities against five human cancer cell lines: HL-60, SMMC-7721, A-549, MCF-7 and SW480 *in vitro*. Alkaloids **1-4** exhibited significant inhibitory effects against various human cancer cell lines with IC<sub>50</sub> values comparable to those of cisplatin.

**Keywords:** *Nauclea orientalis*; indole alkaloid; nauclorenine; cytotoxicities.

---

\*Corresponding author. Tel.: +86-86-898-65889422; Fax: +86-898-65889422;  
E-mail: fuyanhui80@163.com.

# List of Supplementary Material

**Figure S1.** Selected 2D NMR correlations for nauclorenine (**1**).

**Figure S2.**  $^1\text{H}$ -NMR spectrum of nauclorenine (**1**) in  $\text{DMSO-}d_6$ .

**Figure S3.**  $^{13}\text{C}$ -NMR spectrum of nauclorenine (**1**) in  $\text{DMSO-}d_6$ .

**Figure S4.** HSQC spectrum of nauclorenine (**1**) in  $\text{DMSO-}d_6$ .

**Figure S5.** HMBC spectrum of nauclorenine (**1**) in  $\text{DMSO-}d_6$ .

**Figure S6.**  $^1\text{H}$ - $^1\text{H}$  COSY spectrum of nauclorenine (**1**) in  $\text{DMSO-}d_6$ .

**Figure S7.** ROESY spectrum of nauclorenine (**1**) in  $\text{DMSO-}d_6$ .

**Figure S8.** HRESIMS spectrum of nauclorenine (**1**).

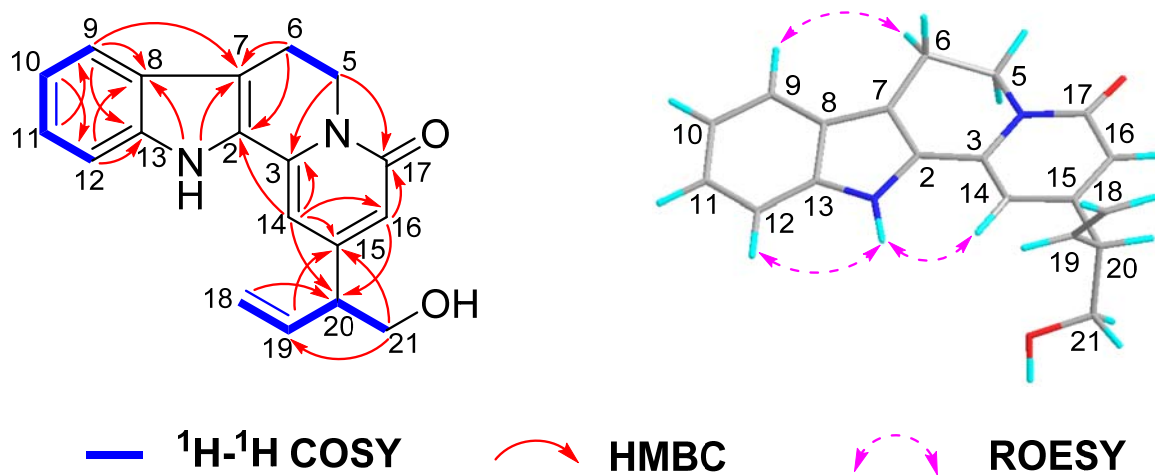

**Figure S1.** Selected 2D NMR correlations for nauclorenine (**1**).

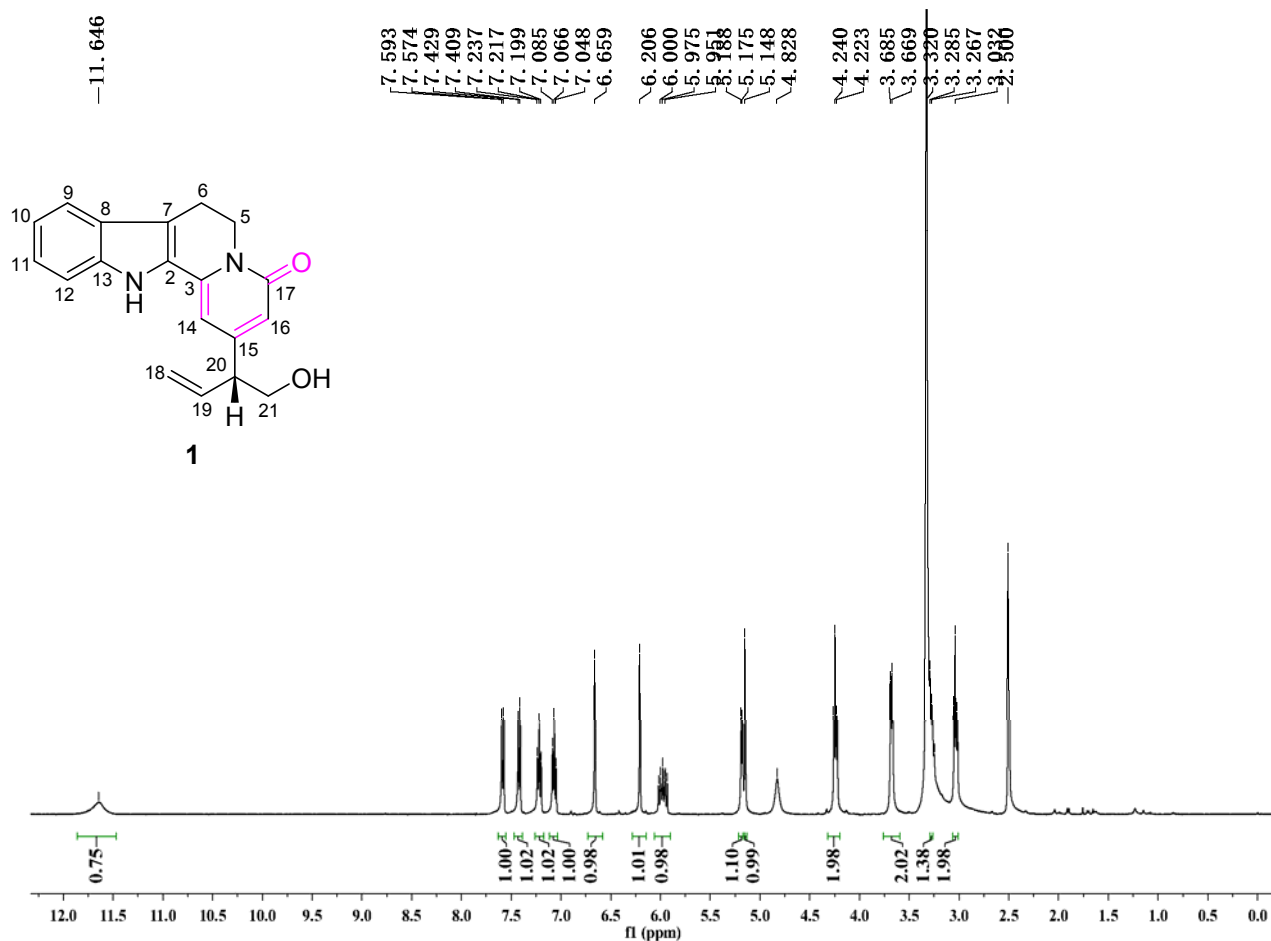

**Figure S2.**  $^1\text{H}$ -NMR spectrum of nauclorenine (**1**) in DMSO- $d_6$ .

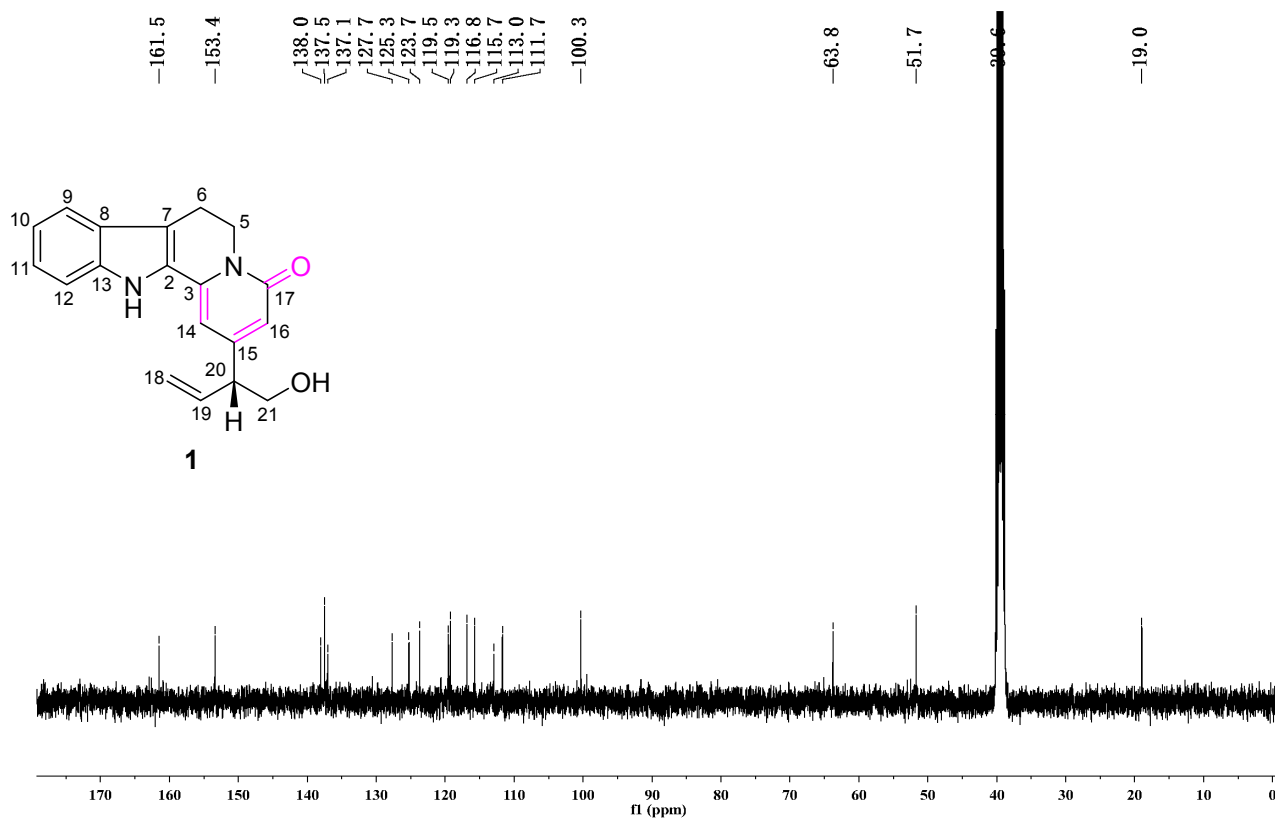

**Figure S3.**  $^{13}\text{C}$ -NMR spectrum of nauclorenine (**1**) in  $\text{DMSO}-d_6$ .

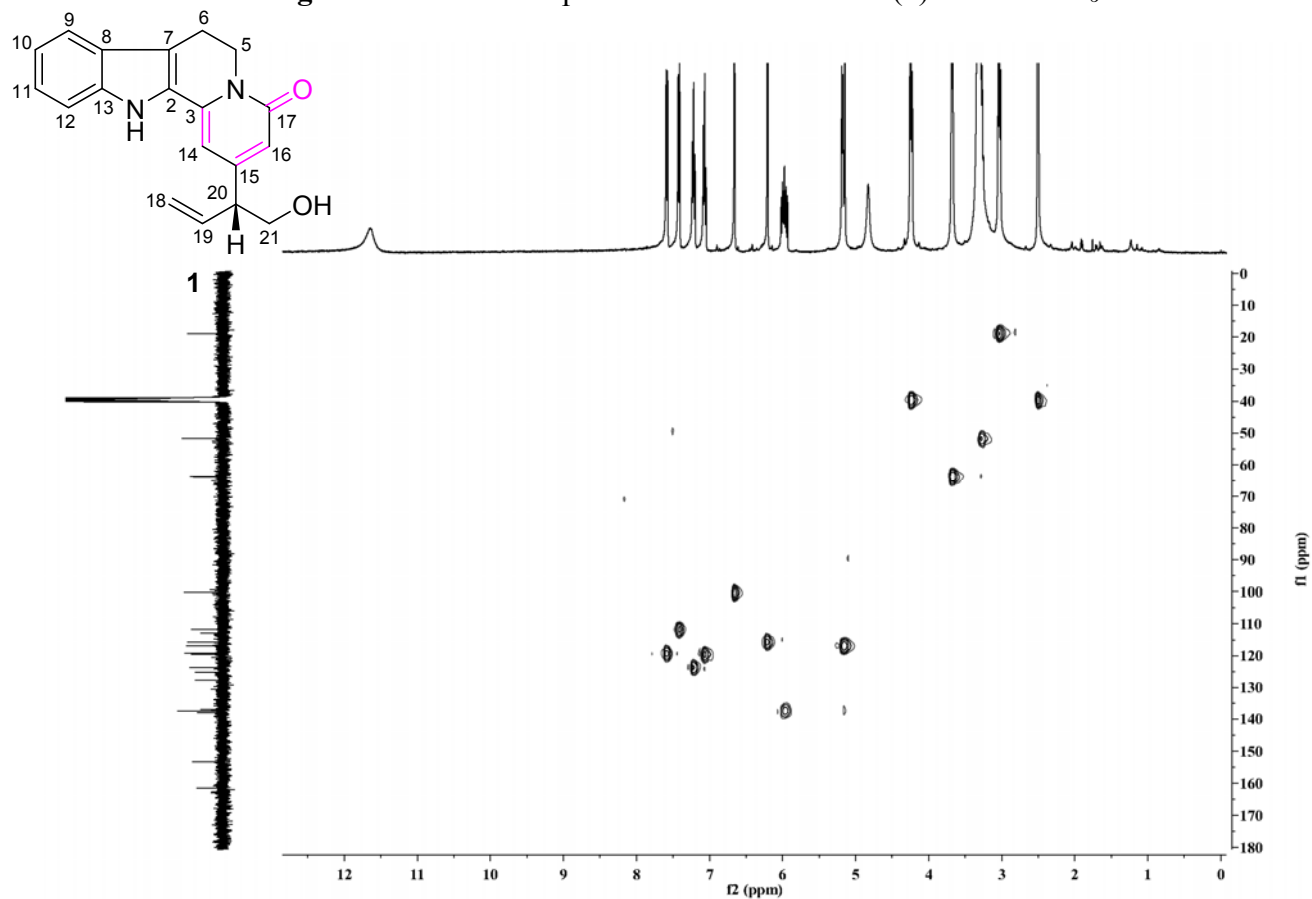

**Figure S4.** HSQC spectrum of nauclorenine (**1**) in  $\text{DMSO}-d_6$ .

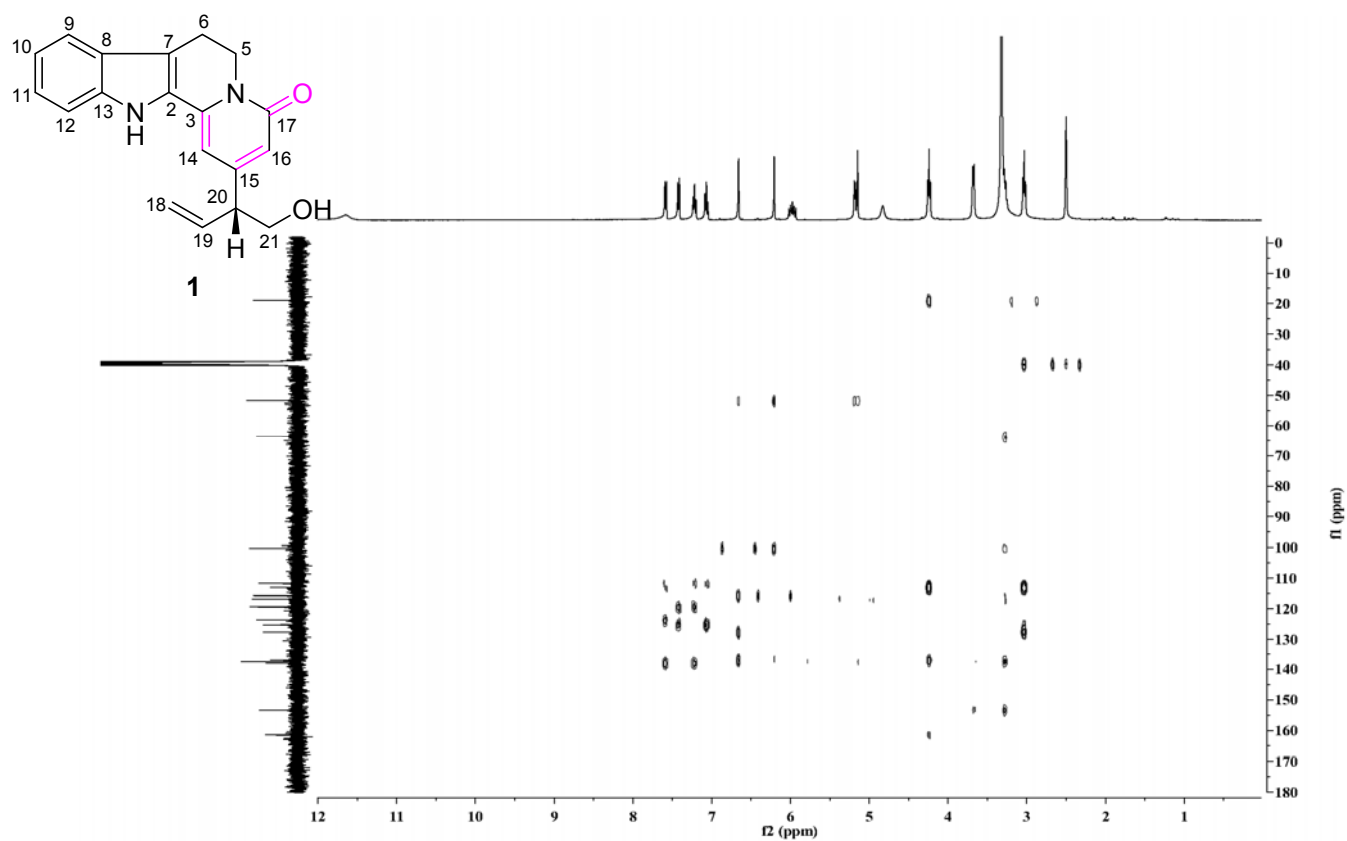

**Figure S5.** HMBC spectrum of nauclorenine (**1**) in DMSO- $d_6$ .

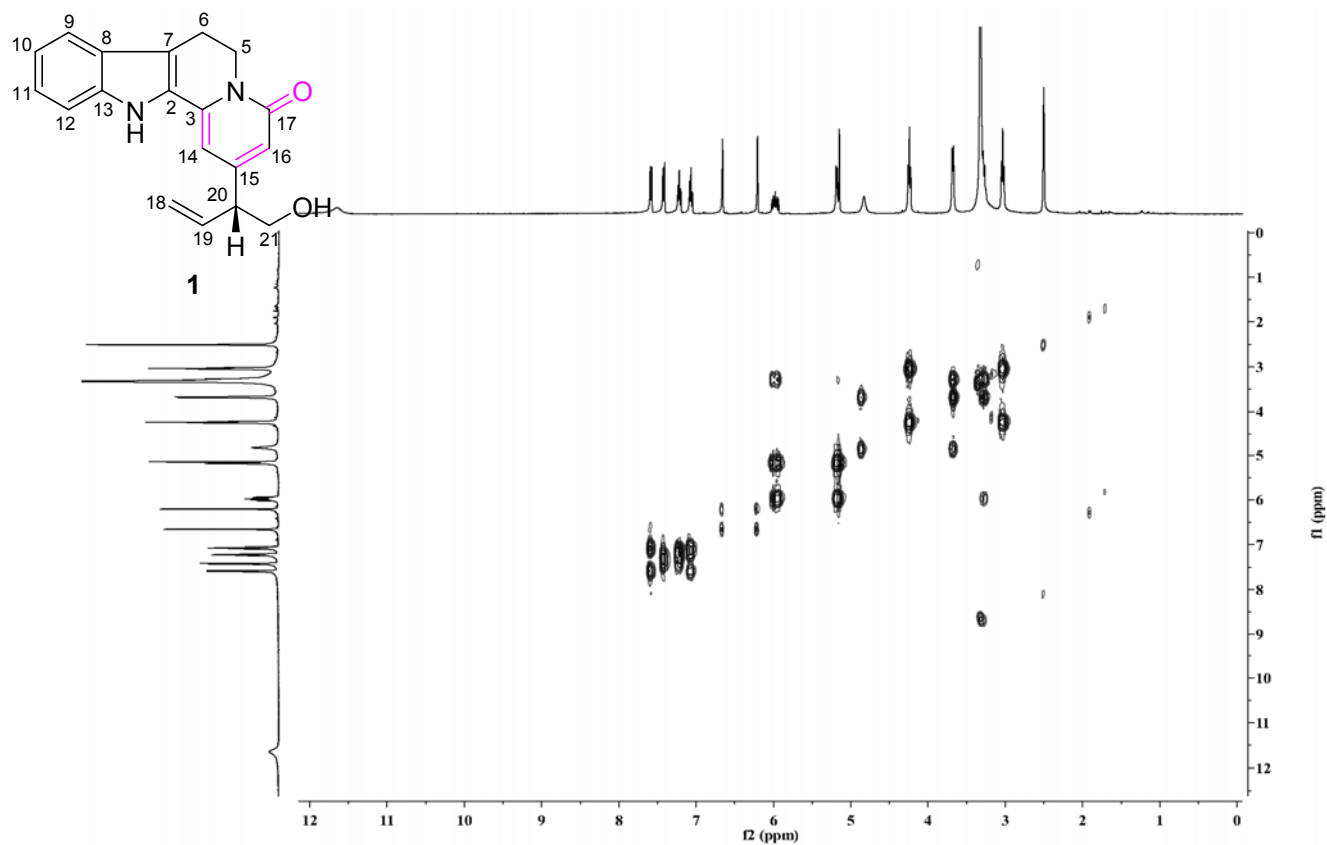

**Figure S6.**  $^1\text{H}$ - $^1\text{H}$  COSY spectrum of nauclorenine (**1**) in DMSO- $d_6$ .

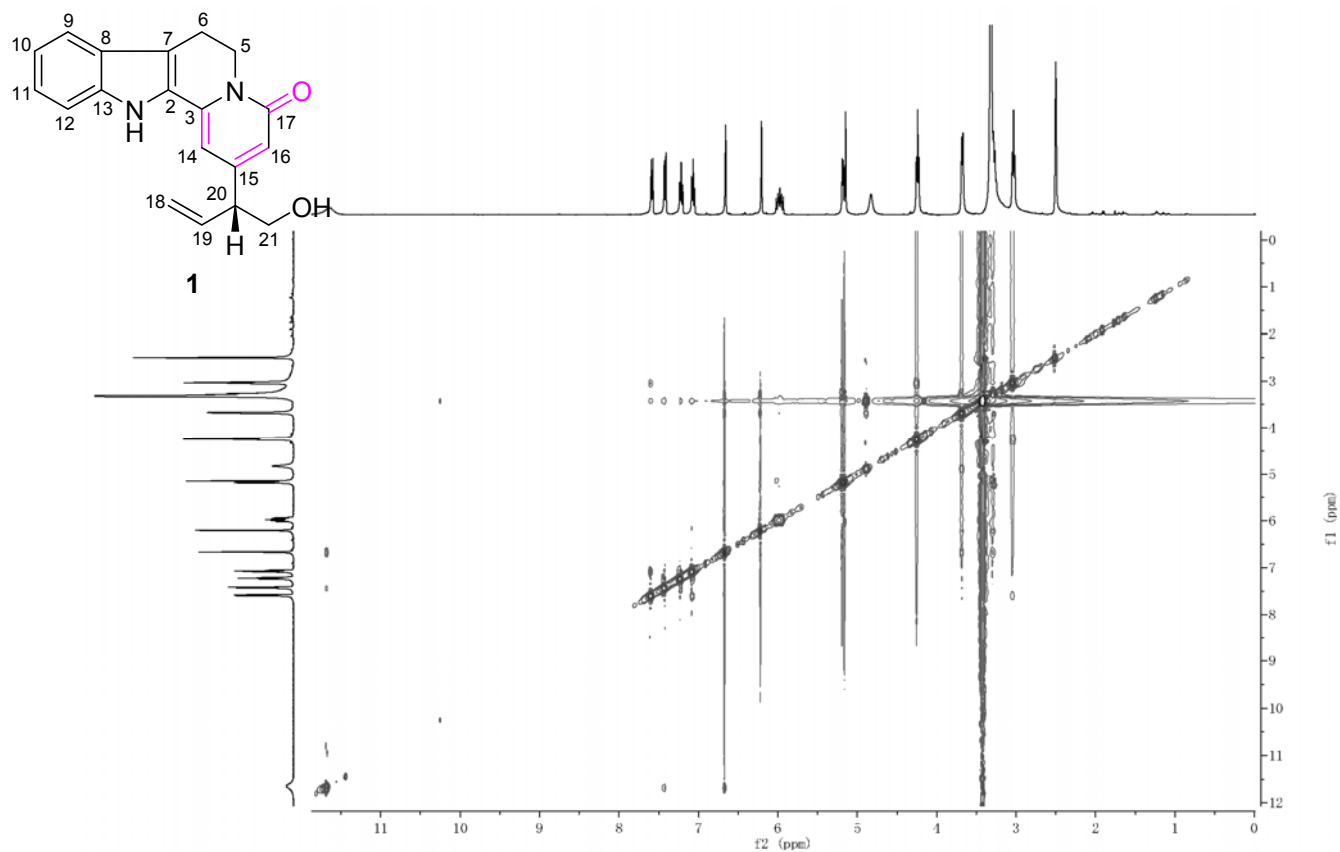

**Figure S7.** ROESY spectrum of nauclorenine (**1**) in DMSO- $d_6$ .

Data File: E:\DATA\2017\0906\HMNO6.lcd

| Elmt | Val. | Min | Max | Use Adduct |
|------|------|-----|-----|------|------|-----|-----|------|------|-----|-----|------|------|-----|-----|------------|
| H    | 1    | 0   | 150 | O    | 2    | 0   | 50  | P    | 3    | 0   | 0   | Br   | 1    | 0   | 0   | H          |
| B    | 3    | 0   | 0   | F    | 1    | 0   | 0   | S    | 2    | 0   | 0   | I    | 3    | 0   | 0   |            |
| C    | 4    | 0   | 50  | Na   | 1    | 0   | 0   | Cl   | 1    | 0   | 0   | Pt   | 2    | 0   | 0   |            |
| N    | 3    | 0   | 10  | Mg   | 2    | 0   | 0   | Fe   | 2    | 0   | 0   |      |      |     |     |            |

Error Margin (ppm): 5

HC Ratio: unlimited

Max Isotopes: all

MSn Iso RI (%): 75.00

DBE Range: -2.0 - 100.0

Apply N Rule: yes

Isotope RI (%): 1.00

MSn Logic Mode: AND

Electron Ions: both

Use MSn Info: yes

Isotope Res: 10000

Max Results: 10

Event#: 2 MS(E-) Ret. Time : 0.470 -&gt; 0.560 Scan#: 96 -&gt; 114

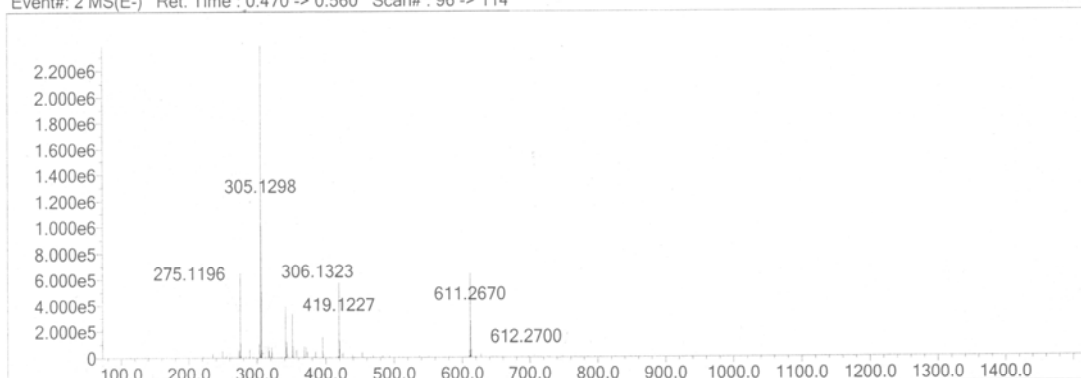

Measured region for 305.1298 m/z

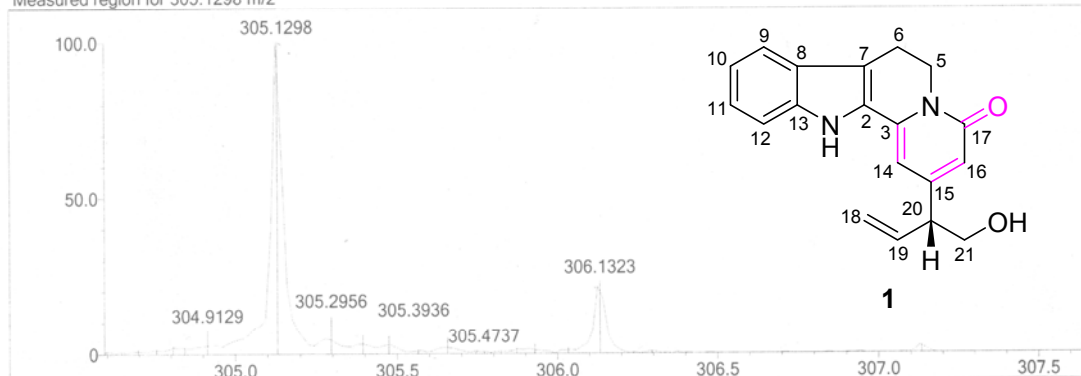

C19 H18 N2 O2 [M-H]- : Predicted region for 305.1296 m/z

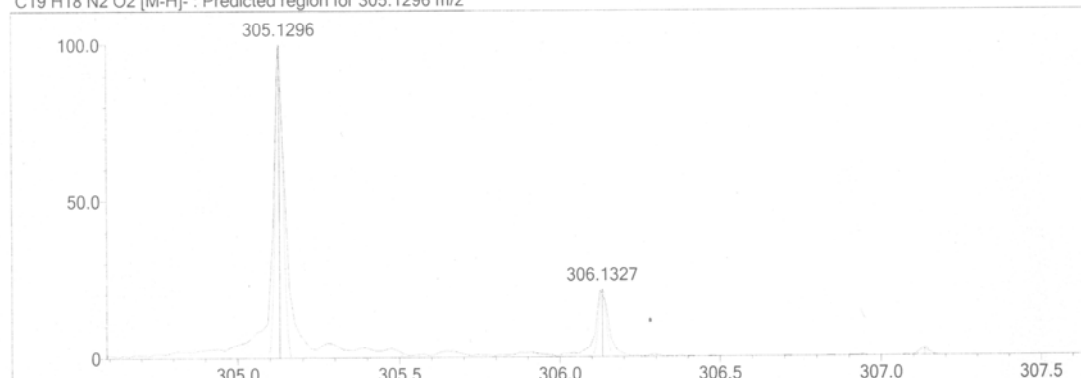

| Formula (M)   | Ion    | Meas. m/z | Pred. m/z | Df. (mDa) | Df. (ppm) | DBE  |
|---------------|--------|-----------|-----------|-----------|-----------|------|
| C19 H18 N2 O2 | [M-H]- | 305.1298  | 305.1296  | 0.2       | 0.66      | 12.0 |

Figure S8. HRESIMS spectrum of nauclorenine (1).
